# Supplementary material
Source: Royal Society of Chemistry journal article supplement (doi:10.1039/d6ay00425c)
Supplement: d6ay00425c1.pdf [file d6ay00425c1.pdf]

### Supplementary Files

Table S1. RT-RPA primers

| Primer                      | Sequence (5' to 3')                |
|-----------------------------|------------------------------------|
| Influenza A Virus           |                                    |
| F-IA-NEW                    | AGGCTCTCATGGAATGGCTAAAGACAAGAC     |
| R-IA-NEW                    | TGGACAAAGCGTCTACGCTGCAGTCCTCGC     |
| F1- IA-106                  | TAAAGACAAGACCAATCTTGTCACCTCTGACT   |
| R1-IA-106                   | TGGACAAAGCGTCTACGCTGCAGTCCTCGCTC   |
| F2-IA-238                   | ATGAGTCTTCTAACCGAGGTCGAAACGTA      |
| R2-IA-238                   | CAAAGCGTCTACGCTGCAGTCCTCGCTC       |
| F-IA-N                      | ATGAGTCTTCTAACCGAGGTCGAAACGTAC     |
| R-IA-N                      | GATTGGTCTTGTCTTTAGCCATTCCATGAGAG   |
| Influenza B Virus           |                                    |
| F3-IB-276                   | TCAAAGGAACAAGGACCAGAGGGAAACTATGC   |
| R3-IB-276                   | TGTAGGGTCCTCCTGGTGCTTTTTCTGCAT     |
| F4-IB-347                   | TTGGAACCTCAGGATCTTGCCCTAACG        |
| R4-IB-347                   | CTGCACCATGTAATCAACAACAATTCT        |
| F-IB-NEW                    | CAAATGAAGAGCCTCTATGGAGACTCAAATC    |
| R-IB-NEW                    | CATGTAATCAACAACAATTCTGCCGCTTG      |
| Respiratory Syncytial Virus |                                    |
| F5- RSV-434                 | GATAGCATAATATCTGTCAACTCAATAGA      |
| R5-RSV-434                  | CTTATTTTTTCTATCATTCTTCTCTTA        |
| F-RSV-NEW-247               | CCAAGTGATAACCCTTTCTCTAAGTTGTAC     |
| R-RSV-NEW-247               | CTCTTAGACCAACCATAGCATCTCTTATTC     |
| F6-RSV-230                  | GATCATTGAGGTAATACAGAAAAATCTAACCAAC |
| R6-RSV-230                  | CCAGCTCCTTCACCTATGAATGCTATACAA     |
| F-RSV-NEW-205               | AATCTAACCAACTTTACACCACCACTTCAC     |
| R-RSV-NEW-205               | GCTCCTTCACCTATGAATGCTATACAACTG     |

Table S2. crRNA and probe sequences

| <b>crRNA</b>                | <b>Sequence (5' to 3')</b>                  |
|-----------------------------|---------------------------------------------|
| Influenza A Virus           |                                             |
| crRNA1                      | UAAUUUCUACUAAGUGUAGAUUGUUCACGCUCACCGUGCCCA  |
| crRNA-IA-NEW1               | UAAUUUCUACUAAGUGUAGAUAGGGGGCCTGACGGGATGAT   |
| crRNA-IA-NEW2               | UAAUUUCUACUAAGUGUAGAUCAAGTCTCTGCGCGATCTCGG  |
| Probe-Cas12a                | FAM-TTATTATT-BHQ1                           |
| Influenza B Virus           |                                             |
| crRNA2                      | UAAUUUCUACUAAGUGUAGAU CUAUAAUGCACGACAGAACAA |
| crRNA3                      | UAAUUUCUACUAAGUGUAGAU UGGUAGUCCUCCGUCUUCUGU |
| Probe-Cas12a                | FAM-TTATTATT-BHQ1                           |
| Respiratory Syncytial Virus |                                             |
| crRNA4                      | UAAUUUCUACUAAGUGUAGAU AUAACAAUGAAGAAGAAUCUA |
| Probe-Cas12a                | FAM-TTATTATT-BHQ1                           |
| crRNA5                      | UAAUUUCUACUAAGUGUAGAU UUGCAUGCUUCCUUGGCAUCA |
| Probe-Cas12a                | FAM-TTATTATT-BHQ1                           |

## Supplementary sequences

### Plasmid templates

#### Influenza A Virus

ATGAGTCTTCTAACCGAGGTCGAAACGTACGTTCTTTCTATCATCCCCTCAGGCCCCCTCAAAGCCGAGA  
TCGCGCAGAGACTGGAAAGTGTCTTTGCAGGAAAGAACACAGATCTTGAGGCTCTCATGGAATGGCTA  
AAGACAAGACCAATCTTGTACCTCTGACTAAGGGAATTTTAGGATTTGTGTTACGCTCACCGTGCCC  
AGTGAGCGAGGACTGCAGCGTAGACGCTTTGTCCA

#### Influenza B Virus

TCAAAGGAACAAGGACCAGAGGGAAACTATGCCCGGACTGTCTCAACTGTACAGATCTGGATGTGGCC  
TTGGGCAGGCCAATGTGTGTGGGGACCACACCTTCTGCTAAAGCTTCAATACTCCATGAGGTCAGACCT  
GTTACATCCGGGTGCTTTCCTATAATGCACGACAGAACAAAAATTAGGCAACTACCCAATCTTCTCAGAG  
GATATGAAAAGATCAGGTTATCAACCCAAAATGTTATTGATGCAGAAAAAGCACCAGGAGGACCCTACA  
GACTTGGAACTCAGGATCTTGCCCTAACGCTACCAGCAAAATCGGATTTTTTGCAACAATGAAAAGCA  
CCAGGAGGACCCTACAGACTTGGAACTCAGGATCTTGCCCTAACGCTACCAGCAAAATCGGATTTTTT  
GCAACAATGGCTTGGGCTGTCCCAAAGGACAACCTACAAAAATGCAACGAACCCACAAACAGTGGAAGT  
ACCATACATTTGTACAGAAGGGGAAGACCAAATTACTGTTTGGGGGTTCCATTTCGGACAACAAAACCCA  
AATGAAGAGCCTCTATGGAGACTCAAATCCTCAAAAGTTCACCTCATCTGCTAATGGAGTAACCACACA  
TTATGTTTCTCAGATTGGCGACTTCCCAGATCAAACAGAAGACGGAGGACTACCACAAAGCGGCAGAAT  
TGTTGTTGATTACATGGTGCAG

#### Respiratory Syncytial Virus

GATAGCATAATATCTGTCAACTCAATAGACATAGAAGTCACTAAAGAGAGCCCGATAACATCTGGCACCA  
ACATTATCAATCCAACAAGTGAAGCCGACAGTACCCAGAACTAAAGCCAACTACCCAAGAAAACCC  
CTAGTAAGCTTCAAAGAAGATCTCACCCCAAGTGATAACCCTTTCTCTAAGTTGTACAAAAGAAACCATA  
GAAACATTTGATAACAATGAAGAAGAATCTAGCTACTCATATGAGGAGATCAATGACCAAACAAATGAC  
AACATTACAGCAAGACTAGATAGAATTGATGAAAAATTAAGTGAAATATTAGGAATGCTCCATACATTAG  
TAGTTGCAAGTGCAGGACCTACTTCGGCTCGTGACGGAATAAGAGATGCTATGGTTGGTCTAAGAGAAG  
AAATGATAGAAAAAATAAG

GATCATTTCAGGTAATACAGAAAAATCTAACCAACTTTACACCACCACTTCACATCAGACATCTTTAGTAA  
GGAATAGTGCATCACTTTATTGCATGCTTCCTTGGCATCATGTCAATAGATTTAACTTTGTATTTAGTTCCA  
CAGGATGCAAGATCAGTATAGAATATATTTTAAAAGATCTTAAGATTAAAGATCCCAGTTGTATAGCATT  
ATAGGTGAAGGAGCTGG
